# Supplementary material
Source: PubMed Central journal article supplement (PMC6255991)

**SUPPLEMENTARY TABLES****Table S1: Non-compartmental PK parameters of oral SENS-111 in the SAD study, arithmetic mean±SD**

| Dose (mg) | C <sub>max</sub> (ng/mL) | T <sub>max</sub> <sup>†</sup> (h) | AUC <sub>0-72</sub> (ng/mL*h) | AUC <sub>0-inf</sub> (ng/mL*h) | t <sub>1/2</sub> (h) | Cl/F (L/h) | Vd/F (L)   |
|-----------|--------------------------|-----------------------------------|-------------------------------|--------------------------------|----------------------|------------|------------|
| 100       | 105 ± 38                 | 1.8 (1.5, 6.0)                    | 1935 ± 294                    | 2276 ± 274                     | 29.9 ± 3.4           | 44.4 ± 4.7 | 1922 ± 332 |
| 200       | 286 ± 78                 | 1.5 (1.0, 2.0)                    | 4158 ± 417                    | 4519 ± 440                     | 22.2 ± 2.0           | 44.6 ± 4.3 | 1430 ± 182 |
| 300       | 456 ± 108                | 1.5 (0.5, 2.0)                    | 6709 ± 1421                   | 7566 ± 1829                    | 26.3 ± 4.0           | 41.2 ± 7.8 | 1545 ± 287 |
| 400       | 960 ± 574                | 1.5 (0.5, 4.0)                    | 11351 ± 3009                  | 12284 ± 3405                   | 21.8 ± 1.6           | 34.4 ± 8.2 | 1068 ± 204 |
| 500       | 1135 ± 430               | 0.5 (0.5, 2.0)                    | 15361 ± 3536                  | 17419 ± 3936                   | 27.8 ± 3.3           | 29.9 ± 6.5 | 1198 ± 271 |

† Median (min, max)

**Table S2: Non-compartmental PK parameters of oral SENS-111 in the MAD studies, arithmetic mean±SD**

| Dose (mg) | Day | C <sub>max</sub> (ng/mL) | T <sub>max</sub> <sup>†</sup> (h) | AUC <sub>0-24</sub> (ng/mL*h) | AUC <sub>0-inf</sub> (ng/mL*h) | t <sub>1/2</sub> (h) | R <sup>#</sup> |
|-----------|-----|--------------------------|-----------------------------------|-------------------------------|--------------------------------|----------------------|----------------|
| 50 (N=9)  | 1   | 35.1 ± 12.9              | 4.0 (1.0, 6.0)                    | 457 ± 94.6                    | 713 ± 105                      | 15.6 ± 3.2           | 2.0 ± 0.4      |
|           | 4   | 57.2 ± 13.4              | 4.0 (1.0, 8.0)                    | 913 ± 183                     | 1889 ± 483                     | 27.8 ± 3.1           |                |
| 100 (N=9) | 1   | 96.9 ± 15.3              | 1.5 (1.0, 6.0)                    | 1256 ± 127                    | 1745 ± 228                     | 12.4 ± 1.7           | 2.0 ± 0.4      |
|           | 4   | 171 ± 35.2               | 1.5 (1.0, 8.0)                    | 2449 ± 502                    | 4534 ± 1570                    | 25.3 ± 5.5           |                |
| 150 (N=9) | 1   | 198 ± 70.9               | 1.0 (0.5, 4.0)                    | 1772 ± 418                    | 2354 ± 593                     | 11.6 ± 1.1           | 1.8 ± 0.2      |
|           | 4   | 261 ± 87.0               | 1.5 (1.0, 6.0)                    | 3152 ± 727                    | 5727 ± 1421                    | 24.8 ± 2.1           |                |
| 200 (N=9) | 1   | 296 ± 102                | 2.0 (1.0, 6.0)                    | 3416 ± 653                    | 4920 ± 1174                    | 13.2 ± 2.3           | 2.7 ± 0.7      |
|           | 7   | 644 ± 275                | 1.5 (1.0, 6.0)                    | 9390 ± 3684                   | 23513 ± 12367                  | 47.6 ± 7.1           |                |
| 250 (N=9) | 1   | 517 ± 182                | 1.0 (0.5, 6.0)                    | 4662 ± 1019                   | 6442 ± 1541                    | 12.7 ± 1.8           | 2.6 ± 0.4      |
|           | 7   | 1088 ± 467               | 1.0 (0.5, 4.0)                    | 12174 ± 3345                  | 28231 ± 9414                   | 55.9 ± 13.5          |                |

† median (range)

#accumulation ratio (AUC<sub>0-24</sub> at D4or D7/AUC<sub>0-24</sub> at D1)

**Table S3: Non-compartmental PK parameters of SENS-111 metabolites in the SAD study, arithmetic mean±SD**

| Metabolite | Dose (mg) | C <sub>max</sub> (ng/mL) | T <sub>max</sub> <sup>†</sup> (h) | AUC <sub>0-72</sub> (ng•h/mL) | AUC <sub>0-inf</sub> (ng•h/mL) | t <sub>1/2</sub> (h) |
|------------|-----------|--------------------------|-----------------------------------|-------------------------------|--------------------------------|----------------------|
| UR-64167   | 100 (N=6) | 6.4 ± 2.0                | 2.0 (1.5, 6.0)                    | 128 ± 31                      | 164 ± 37                       | 36.9 ± 19.9          |
|            | 200 (N=6) | 14.0 ± 4.6               | 1.5 (1.0, 2.0)                    | 254 ± 41                      | 280 ± 49                       | 22.3 ± 4.3           |
|            | 300 (N=6) | 16.5 ± 2.6               | 1.8 (1.0, 2.0)                    | 308 ± 45                      | 356 ± 58                       | 28.2 ± 5.5           |
|            | 400 (N=6) | 37.3 ± 24.5              | 1.5 (0.5, 8.0)                    | 542 ± 85                      | 598 ± 87                       | 23.7 ± 3.3           |
|            | 500 (N=6) | 43.8 ± 25.9              | 1.0 (0.5, 2.0)                    | 769 ± 383                     | 869 ± 396                      | 27.6 ± 5.0           |
| UR-64250   | 100 (N=6) | -                        | -                                 | -                             | -                              | -                    |
|            | 200 (N=6) | 1.5 ± 1.4                | 2.0 (1.5, 4.0)                    | 13.7 ± 16.6                   | 31 ± 19                        | 45.3 ± 20.3          |
|            | 300 (N=6) | 2.5 ± 2.1                | 3.0 (1.5, 6.0)                    | 35 ± 38                       | 61 ± 39                        | 29.8 ± 24.5          |
|            | 400 (N=6) | 2.8 ± 1.8                | 3.0 (1.0, 8.0)                    | 41 ± 37                       | 55 ± 40                        | 30.9 ± 18.7          |
|            | 500 (N=6) | 6.6 ± 8.3                | 2.0 (1.5, 4.0)                    | 112 ± 162                     | 134 ± 174                      | 36.0 ± 30.0          |

† Median (min, max)

**Table S4: Non-compartmental PK parameters of SENS-111 metabolites in the MAD study, arithmetic mean±SD**

| Metabolite | Dose (mg) | Day | C <sub>max</sub> (ng/mL) | T <sub>max</sub> (h) | AUC <sub>0-t*</sub> (ng•h/mL) | AUC <sub>0-inf</sub> (ng•h/mL) | t <sub>1/2</sub> (h) |
|------------|-----------|-----|--------------------------|----------------------|-------------------------------|--------------------------------|----------------------|
| UR-64167   | 50 (N=9)  | 1   | 2.0 ± 0.3                | 4.0 (1.0, 6.0)       | 28.0 ± 2.9                    | 41.4 ± 5.1                     | 13.8 ± 1.7           |
|            |           | 4   | 3.3 ± 0.7                | 4.0 (1.0, 6.0)       | 79.3 ± 22.7                   | 104 ± 32.5                     | 26.3 ± 8.0           |
|            | 100 (N=9) | 1   | 4.9 ± 1.2                | 1.5 (1.5, 6.0)       | 66.4 ± 18.2                   | 93.1 ± 28.0                    | 12.5 ± 1.6           |
|            |           | 4   | 8.4 ± 2.6                | 2.0 (1.0, 8.0)       | 202 ± 83.3                    | 236 ± 112                      | 24.3 ± 6.0           |
|            | 150 (N=9) | 1   | 8.2 ± 2.7                | 1.5 (1.0, 4.0)       | 90.8 ± 19.6                   | 127 ± 30.3                     | 12.9 ± 1.8           |
|            |           | 4   | 11.7 ± 3.5               | 2.0 (1.0, 6.0)       | 266 ± 74.4                    | 310 ± 89.3                     | 27.1 ± 3.1           |
|            | 200 (N=9) | 1   | 15.5 ± 7.1               | 2.0 (1.0, 6.0)       | 193 ± 76                      | 285 ± 119                      | 13.9 ± 2.9           |
|            |           | 7   | 30.4 ± 15.9              | 1.5 (1.0, 8.0)       | 1174 ± 816                    | 1269 ± 870                     | 44.1 ± 15.3          |
|            | 250 (N=9) | 1   | 22.7 ± 15.3              | 1.5 (1.0, 6.0)       | 240 ± 97                      | 341 ± 122                      | 13.4 ± 2.9           |
|            |           | 7   | 30.4 ± 15.9              | 1.5 (1.0, 8.0)       | 1174 ± 816                    | 1269 ± 870                     | 44.1 ± 15.3          |
| UR-64250   | 50 (N=9)  | 1   | 0.6 ± 0.04               | 8.0 (4.0, 8.0)       | 1.3 ± 2.0                     | NC                             | NC                   |
|            |           | 4   | 0.8 ± 0.2                | 4.0 (1.5, 6.0)       | 4.2 ± 5.2                     | NR                             | NR                   |
|            | 100 (N=9) | 1   | 1.3 ± 0.6                | 4.0 (1.5, 4.0)       | 4.4 ± 6.0                     | NR                             | NR                   |
|            |           | 4   | 1.5 ± 0.9                | 4.0 (2.0, 4.0)       | 10.6 ± 14.3                   | NR                             | NR                   |
|            | 150 (N=9) | 1   | 1.2 ± 0.5                | 2.0 (1.5, 4.0)       | 6.1 ± 8.3                     | NR                             | NR                   |
|            |           | 4   | 1.3 ± 1.0                | 4.0 (1.5, 6.0)       | 17.0 ± 22.7                   | NR                             | NR                   |
|            | 200 (N=9) | 1   | 3.8 ± 5.2                | 4.0 (1.5, 6.0)       | 45.8 ± 67.3                   | NR                             | NR                   |
|            |           | 7   | 8.2 ± 13.0               | 4.0 (1.5, 4.0)       | 292 ± 559                     | 368 ± 622                      | 26.7 ± 12.3          |
|            | 250 (N=9) | 1   | 1.6 ± 0.7                | 2.0 (1.5, 6.0)       | 16.6 ± 11.3                   | NR                             | NR                   |
|            |           | 7   | 3.6 ± 1.4                | 4.0 (1.0, 4.0)       | 86.0 ± 53.2                   | 117 ± 64.5                     | 26.3 ± 12.9          |

† Median (min, max)

NC, not calculated; NR, not reached

\*AUC<sub>0-t</sub> t= 24 h for Day 1, 72 h for Day 4, 196 h for Day 7

**SUPPLEMENTARY FIGURES**

**Figure S1: Mean (SD) plasma concentration-time profiles for SENS-111.** (A) for the SAD study on day 1; (B) for the 4-day MAD study after 1 day (dotted lines) and 4 days (solid lines); and (C) for the 7-day MAD study after 1 day (dotted lines) and 7 days (solid lines).

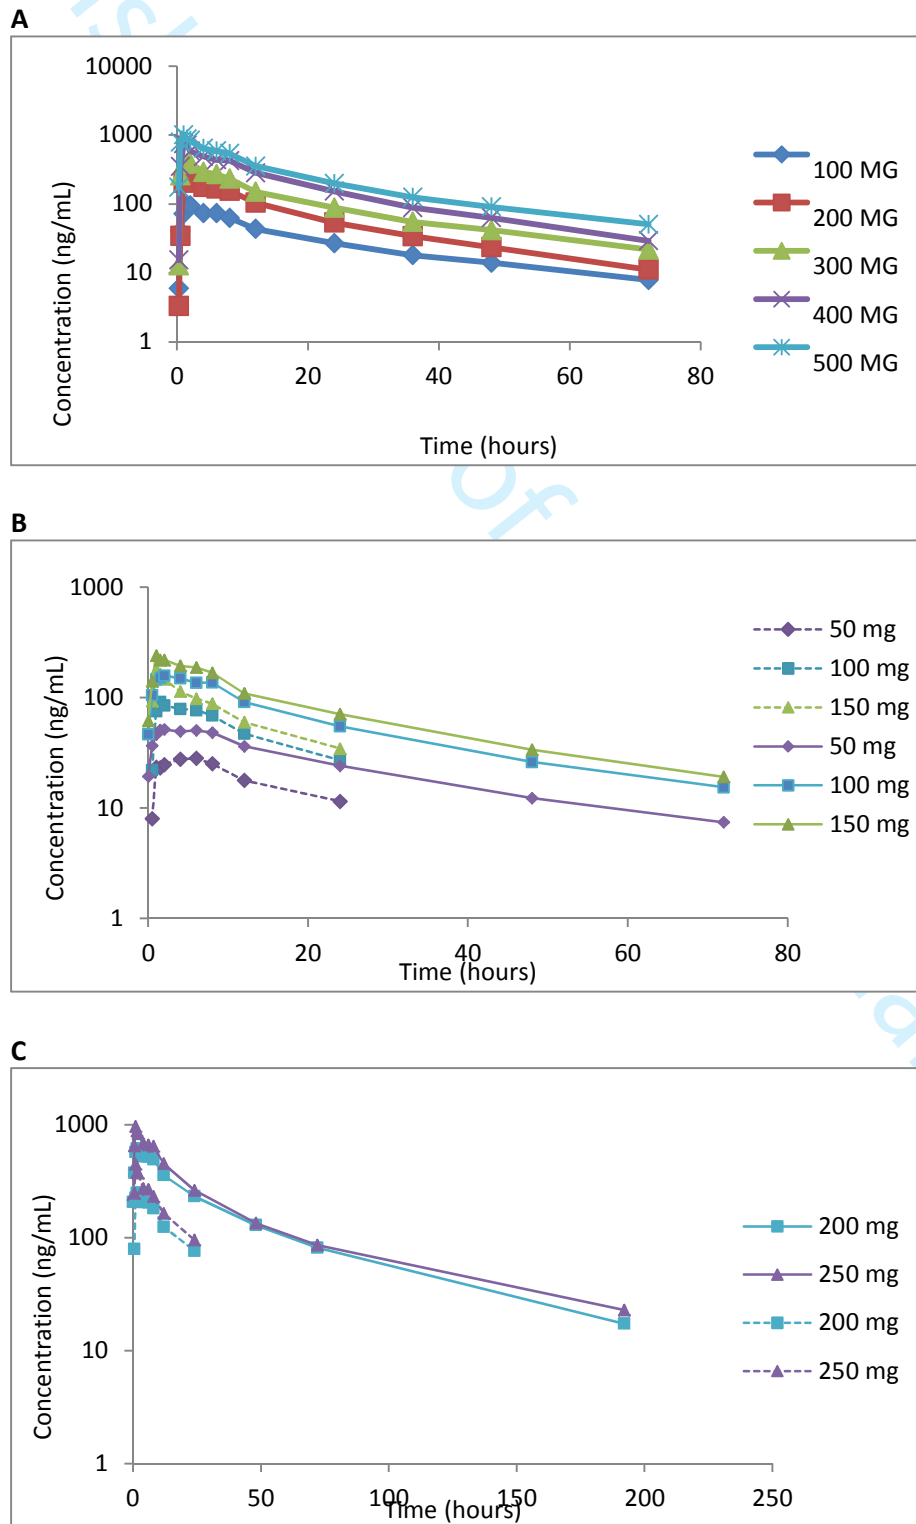

Figure S2: Goodness of fit plots for SENS-111.

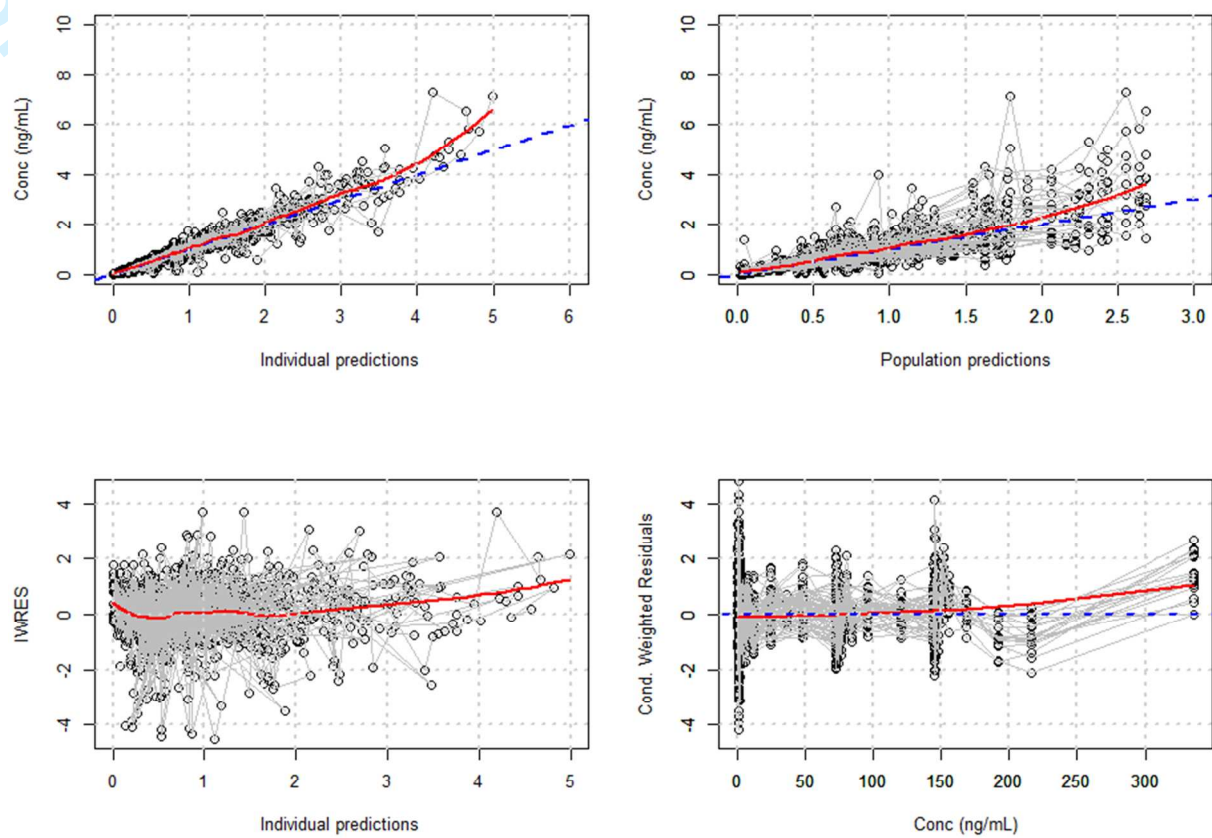

**Figure S3: Visual predictive checks (VPCs) using untransformed data to estimate the time-varying change in SENS-111 exposure (200 mg on day 1 versus day 7) and dose-dependent SENS-111 exposure**

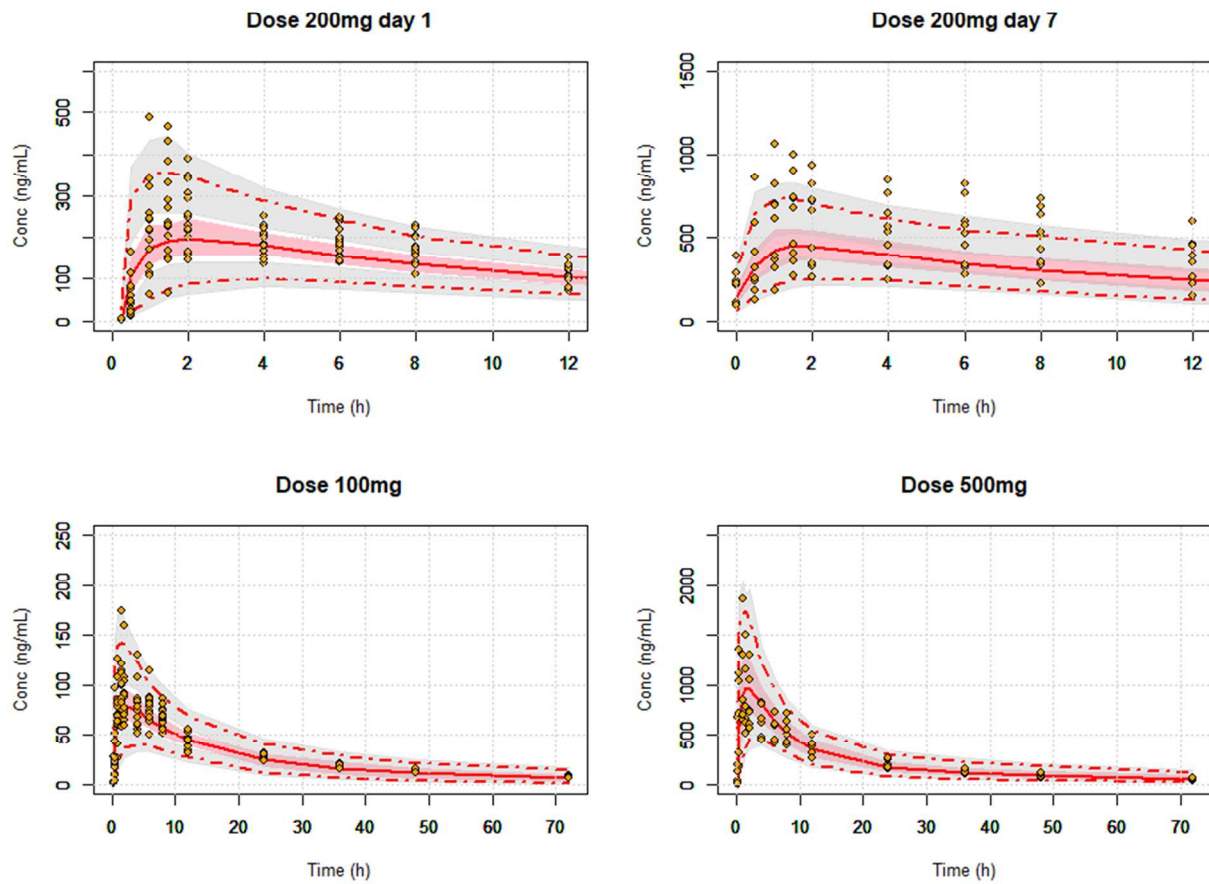

**Figure S4: Mean absolute and relative change from baseline over time with placebo treatment are shown for duration of vertigo, and latency of appearance and disappearance.**

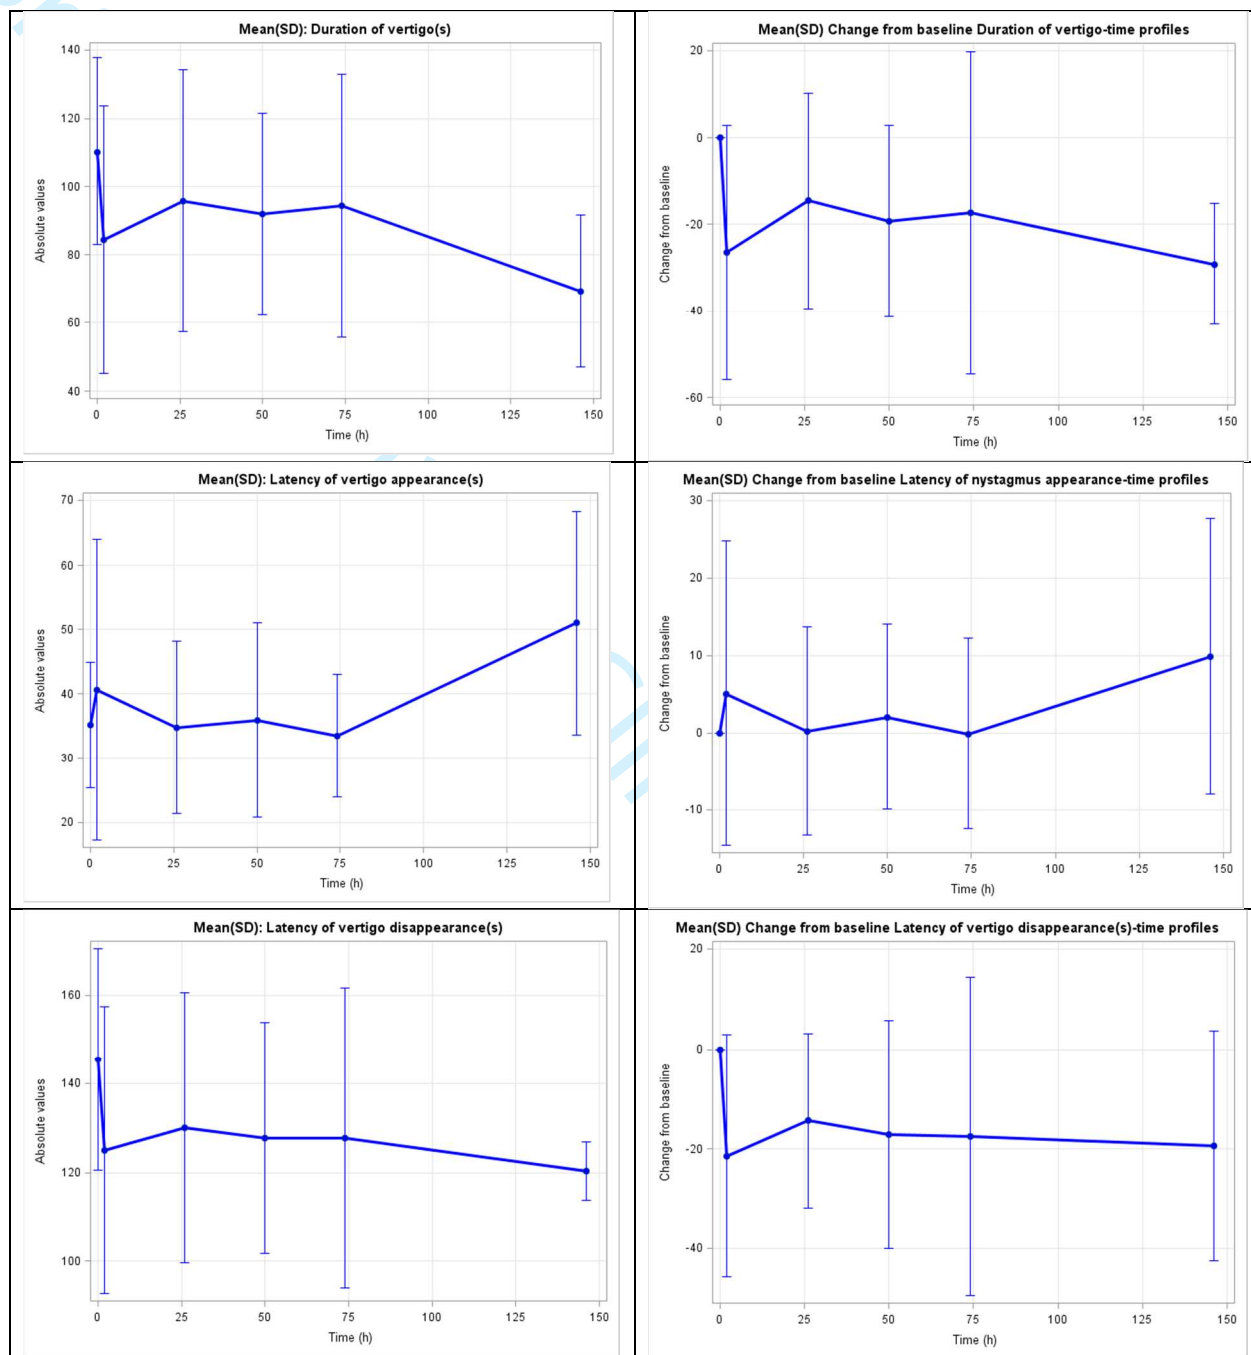

**Figure S5: Boxplots of showing the relationship between vertigo duration, and latency of appearance and disappearance with level of SENS-111 exposure.**

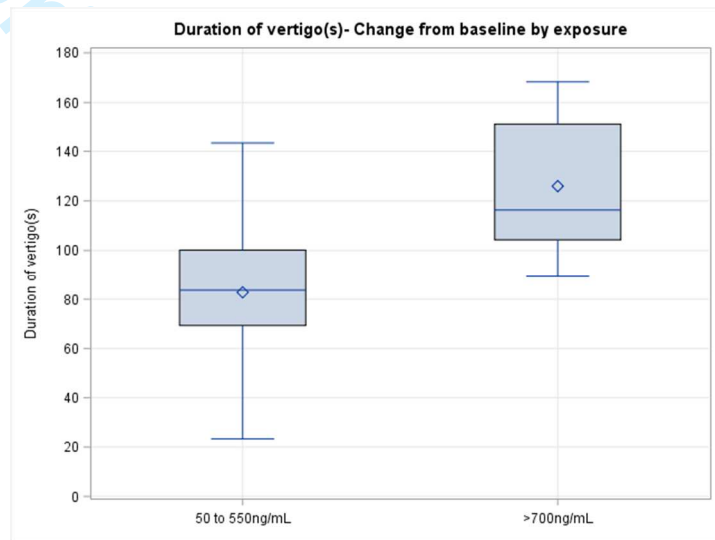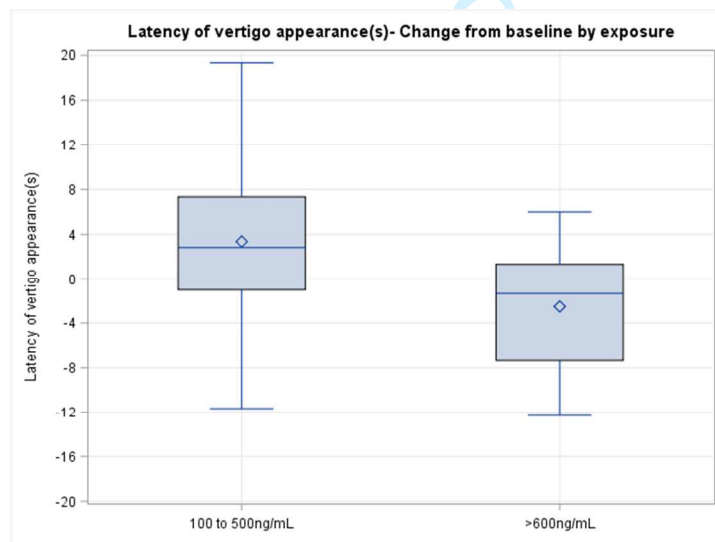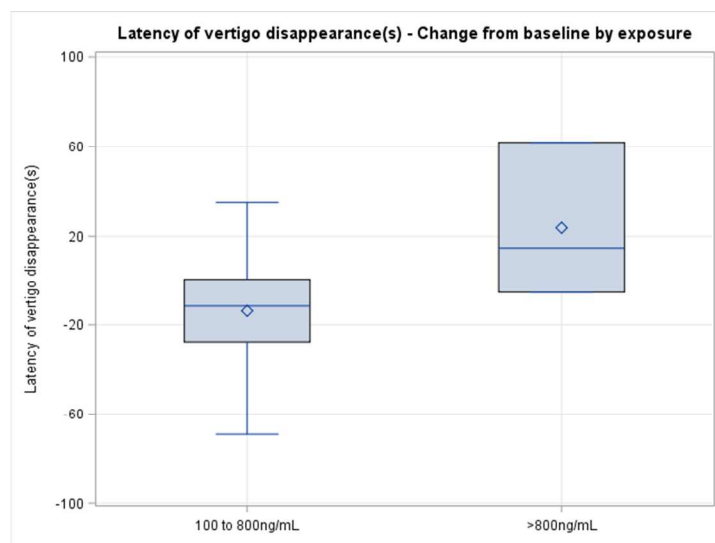

Supplement: BCP-84-2836-s001.pdf [file BCP-84-2836-s001.pdf]
